# Supplementary material for: Protective MVA-ST Vaccination Robustly Activates T Cells and Antibodies in an Aged-Hamster Model for COVID-19
Source: MDPI journal article supplement (doi:10.3390/vaccines12010052), 2024-01-03
Supplement: s1 [file s1]

**A**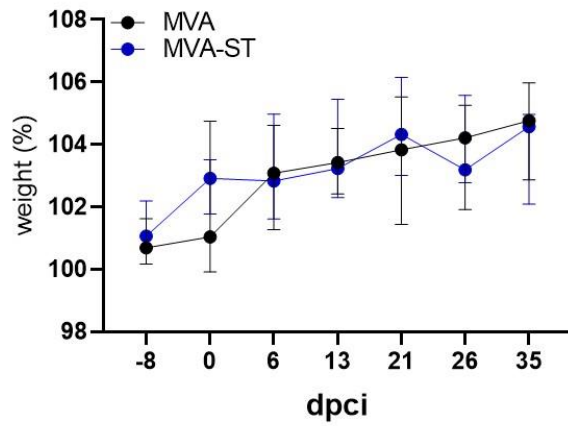**B**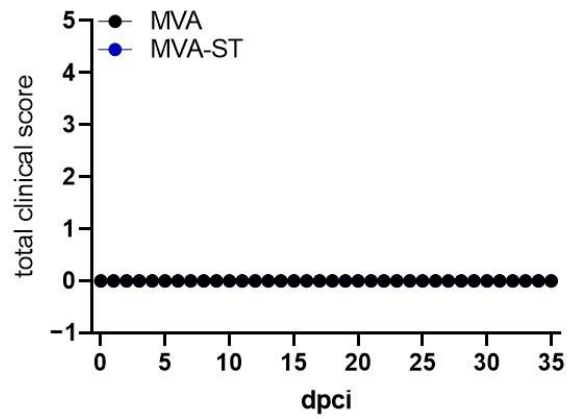

**Figure S1.** MVA ST-immunization and monitoring for side effects in aged hamsters. Groups of hamsters were vaccinated twice, via the intramuscular route, in a 21-day interval with  $10^8$  PFU of either non-recombinant MVA or MVA expressing the stabilized version of the SARS-CoV-2 S protein (MVA-ST). All Hamsters were monitored daily for body weight changes (A) and clinical symptoms (B) after each vaccination.

#### SARS-CoV-2 N protein of USA-WA1/2020

Peptides 17- to 13-mer, with 10 peptides overlap

MSDNGPQNQR NAPRITFGGP SDTGSNQNG ERSGARSKQR RPQGLPNNTA SWFTALTQHG KEDLKFRPQG  
GVPINTNSSP DDQIGYYRRA TRRIRGGDGK MKDLSRWYF YYLGTGPEAG LPYGANKDGI IWVATEGALN  
TPKDHIGTRN PANNAIVLQ LPQGTTLPGK FYAEGSRGGS QASSRSSRS RNSSRNSTPG SSRGTSPARM  
AGNGGDAALA LLLDRLNQL ESKMSGKGQQ QQQQTVTKKS AAEASKKPRQ KRTATKAYNV TQAFGRRGPE  
QTQGNFGDQE LIRQGTDYKH WPQIAQFAPS ASAFFGMSRI GMEVTPSGTW LTYTGAIKLD DKDPNFKDQV  
ILLNKHIDAY KTFPPTEPKK DKKKKADETQ ALPQRQKKQQ TVTLLPAADL DDFSKQLQQS MSSADSTQA

#### SARS-CoV-2 S protein of USA-WA1/2020

Peptides 17- to 13-mer, with 10 peptides overlap

MFVFLVLLPL VSSQCVNLTT RTQLPPAYTN SFTRGVYYPD KVFRSSVLHS TQDLFLPFFS NVTWFHAIHV  
SGTNGTKRFD NPVLFPNDGV YFASTKSNI IRGWIFGTL DSKTQSLIV NNATNVVIKV CEFQFCNDPF  
LGVIYHKNNK SWMESEFRVY SSANNCTFEY VSQPLMDLE GKQGNFKNLR EFVFKNIDGY FKYSKHTPI  
NLVRDLPOQE SALEPLVDLP IGINITRFQT LLALHRSYLT PGDSSSGWTA GAAAYYVGYL QPRTFLKYN ENG-  
TITDAVD CALDPLSETK CTLKSFTVEK GIYQTSNFRV QPTESIVRFP NITNLCPFGE VFNATRFASV YAWNKRISN  
CVADYSVLYN SASFSTFKCY GVSPTKLNLD CFTNVYADSF VIRGDEVROI APGQTGKIAD YNYKLPDDFT  
GCVIAWNSNN LDSKVGGNYN YLYRLFKNK LKPFERDIST EIYQAGSTPC NGVEGFNCYF PLOSYGFQPT  
NGVGYQPYRV VVLSFELLHA PATVCGPKKS TNLVKNKCVN FNFNGLTGTG VLTESNKKFL PFOQFGRDIA DTT-  
DAVRDPQ TLEILDITPC SFGGVSVITP GTNTSNOVAV LYQDVNCTEV PVAIHADQLT PTWRVYSTGS NVFOTRA  
GCL IGAEHVNNSY ECDIFIGAGI CASYOTOTNS PRARSVASO SIAYTMSLG AENSVAYSNN SIAIPTNFTI  
SVTTEILPVS MTKTSVDCTM YICGDSSTCS NLLLOYGSEC TOLNRALTGI AVEODKNTOE VFAOVKQYK TPIK-  
DFGGF NFSQILPDPS KPSKRSFIED LLFNKVTLD AGFIKQYGDC LGDIAARDLI CAQKFNGLTV LPPLLTDEMI  
AOYTSALLAG TITSGWTFGA GAALOFPAM OMAYRENGIG VTONVLYENO KLIANOFNSA IGKIODSLSS  
TASALGKLOD VVNONAOALN TLVKOLSSNF GAISSVLNDI LSRLDKVEAE VOIDRLITGR LOSLOTYVTO OLI-  
RAAEIRA SANLAATKMS ECVLGOSKRV DFCGKGHYLM SFROSAPHGV VFLHVTYVPA OEKNFTTAPA  
ICHDGKAHP REGVFSNGT HWFVTORNEY EPOITTDNT FVSGNCDVVI GIVNNTVYDF LOPELDSFKE  
ELDKYFNHT SPDVDLGDIS GNASVVNIO KEIDRLNEVA KNLNESLIDL OELGKYEOYI KWPWYTWLGF IAGLI-  
AIVMV TIMLCMTSC CSCLKGCCSC GSCCKFDEDD SEPVLKGVKL HYT

**Figure S2.** Protein sequence of SARS-CoV-2 nucleoprotein (N) and SARS-CoV-2 spike protein (S) used for splenocyte stimulation. The SARS-CoV-2 nucleoprotein comprises of 419 amino acids (aa). For hamster splenocyte stimulation, one peptide pool, consisting of 59 overlapping peptides, were derived from the SARS-CoV-2 N protein sequence. Each single peptide consists of 17 or 13 amino acids (17- or 13-mers) overlapping in 10 amino acids with the following peptide. The SARS-CoV-2 spike glycoprotein comprises 1273 aa. For hamster splenocyte stimulation, two peptide pools (S1, underlined in yellow, and S2, underlined in blue, amino acids underlined in green present in both pools), consisting of 91 and 90 overlapping peptides, were derived from the SARS-CoV-2 S protein sequence. Each single peptide consists of 17 or 13 amino acids (17- or 13-mers) overlapping in 10 amino acids with the following peptide.
